# Supplementary material for: Correlation of Tumor Burden in Sentinel Lymph Nodes with Tumor Burden in Nonsentinel Lymph Nodes and Survival in Cutaneous Melanoma
Source: Oxford University Press journal article supplement (doi:10.1158/1078-0432.ccr-19-1194), 2019-09-30
Supplement: 10780432ccr191194-sup-220484_2_supp_5789626_py4ws8.docx [file 10780432ccr191194-sup-220484_2_supp_5789626_py4ws8.docx]

**Supplemental materials**

**Supplemental Table 1A.** Relationship between RFS and MSS, and size of tumor deposit in the SLN using the cut-off values of < 0.1 mm, 0.1-1.0 mm, and > 1.0 mm (univariate analysis)

**Supplemental Table 1B.** Relationship between SLN and non-SLN tumor burden using the cut-off values of < 0.1 mm, 0.1-1.0 mm, and > 1.0 mm (univariate analysis)
